# Supplementary material
Source: publisher figshare collection journal article supplement (https://frontiersin.figshare.com/ndownloader/files/29127987)
Supplement: Supplementary file [file 29127987]

**Vaginal Probiotic *Lactobacillus crispatus* With the Dual Role of Inhibiting  
Sperm Activity and Reducing Pregnancies**

*Ping Li<sup>1</sup>, Kehong Wei<sup>1</sup>, Xia He<sup>2</sup>, Lu Zhang<sup>1</sup>, Zhaoxia Liu<sup>3</sup>, Jing Wei<sup>1</sup>, Xiaomei  
Chen<sup>1</sup>, Hong Wei<sup>4\*</sup>, Tingtao Chen<sup>1\*</sup>*

*<sup>1</sup> School of Life Sciences, Institute of Translational Medicine, Nanchang University,  
Nanchang, China, <sup>2</sup> Department of Obstetrics and Gynecology, The Ninth Hospital of  
Nanchang, Nanchang, China, <sup>3</sup> Department of Obstetrics and Gynecology, The  
Second Affiliated Hospital of Nanchang University, Nanchang, China, <sup>4</sup> Precision  
Medicine Institute, The First Affiliated Hospital, Sun Yat-sen University, Guangzhou,  
China*

***\*Corresponding:***

*Tingtao Chen, Institute of Translational Medicine, Nanchang University, Nanchang  
330031, PR China; E-mail: chentingtao1984@163.com*

*Hong Wei, Precision Medicine Institute, The First Affiliated Hospital, Sun Yat-sen  
University, Guangzhou 510080, PR China; E-mail: weihong63528@163.com*

**Supplementary Figure 1** | The effect of the tested bacteria on the fetal health. **(A)** The number of living fetus. **(B)** The number of dead fetus. **(C)** The number of absorbed fetus. **(D)** The number of malformed fetus. The data represent means  $\pm$  SD of 8-10 animals.  $*P < 0.05$ ,  $**P < 0.01$ . SD, standard deviation; C, control; V, VNP20009; VD, VNP20009 DNase I; E, *E. coli* O157:H7; L, *L. crispatus*.

**Supplementary Figure 2** | The number of microbial groups contained in different samples at different taxonomic levels.

**Supplementary Figure 3** | Microbial diversity in the C, V, VD, E and L groups. **(A)** linear discriminant analysis effect size analysis. **(B)** Metastats analysis. LDA, linear discriminant analysis; C, control; V, VNP20009; VD, VNP20009 DNase I; E, *E. coli* O157:H7; L, *L. crispatus*.

**Supplementary Figure 4** | The effect of *L. crispatus* and broad-spectrum antibiotics on the vaginal microbiota diversity of rats. **(A)** The observed species; **(B)** the Shannon index; **(C)** the Simpson index. **(D)** Microbial composition at the phylum level. **(E)** Microbial composition at the genus level. **(F)** Venn diagram of the vaginal microbiota among C, ABX, L groups. **(G)** PCoA of vaginal bacterial communities among C, ABX, L groups. The data represent means  $\pm$  SD of 4 animals.  $*P < 0.05$ ,  $**P < 0.01$ . SD, standard deviation; C, control; ABX, wide-spectrum antibiotic; L, *L. crispatus*; PCoA, Principle coordination analysis.
